# Supplementary material for: Local support of climate change policies is driven by spatial diffusion
Source: Research Square preprint supplement (doi:10.21203/rs.3.rs-2088048/v1), 2022-09-22
Supplement: Supplementary file 1 [file df0618fd9baf0599dce31475.xlsx]

## Sheet: Sheet 1
code
